# Supplementary material for: Combined Effect of Salicylic Acid and Proline Mitigates Drought Stress in Rice (Oryza sativa L.) through the Modulation of Physiological Attributes and Antioxidant Enzymes
Source: MDPI journal article supplement (doi:10.3390/antiox12071438), 2023-07-18
Supplement: s1 [file s1]

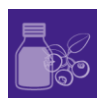

**Supplementary Materials:** The following supporting information can be downloaded at: [www.mdpi.com/article/10.3390/antiox12071438/s1](http://www.mdpi.com/article/10.3390/antiox12071438/s1).

**Table S1.** Exogenous application of different concentration of salicylic acid and/or proline on growth and biomass of rice under drought stress.

| Variety     | Treatment                   |     | Plant height (cm) | Fresh Weight (g)/Plant | Total Chlorophyll (mg g <sup>-1</sup> FW) |
|-------------|-----------------------------|-----|-------------------|------------------------|-------------------------------------------|
| BRRI dhan66 | Control                     | T1  | 38.6 ± 1.69 a     | 0.471 ± 0.02 a         | 4.72 ± 0.31 a                             |
|             | Drought (D)                 | T2  | 34.9 ± 2.55 d     | 0.381 ± 0.03 f         | 4.01 ± 0.42 d                             |
|             | D + 1 mM SA                 | T3  | 35.8 ± 2.16 c     | 0.414 ± 0.02 d         | 4.22 ± 0.51 c                             |
|             | D + 1.5 mM SA               | T4  | 36.7 ± 2.15 b     | 0.441 ± 0.01 bc        | 4.51 ± 0.29 ab                            |
|             | D + 2 mM SA                 | T5  | 36.1 ± 1.58 b     | 0.426 ± 0.03 cd        | 4.31 ± 0.36 bc                            |
|             | D + 1 mM Pro                | T6  | 35.5 ± 1.95 c     | 0.408 ± 0.03 de        | 4.18 ± 0.41 c                             |
|             | D + 2 mM Pro                | T7  | 36.4 ± 2.31 b     | 0.431 ± 0.03 c         | 4.45 ± 0.51 b                             |
|             | D + 3 mM Pro                | T8  | 35.8 ± 2.44 c     | 0.418 ± 0.02 d         | 4.28 ± 0.61 bc                            |
|             | D + (1.5 mM SA + 2 mM Pro)  | T9  | 34.3 ± 2.71 d     | 0.408 ± 0.02 de        | 3.89 ± 0.22 e                             |
|             | D + (1 mM SA + 1 mM Pro)    | T10 | 36.8 ± 1.91 b     | 0.446 ± 0.03 b         | 4.48 ± 0.31 b                             |
|             | D + (0.75 mM SA + 1 mM Pro) | T11 | 37.3 ± 1.28 ab    | 0.449 ± 0.02 b         | 4.69 ± 0.33 a                             |
| BRRI dhan75 | Control                     | T1  | 35.2 ± 2.41 c     | 0.452 ± 0.01 b         | 4.88 ± 0.51 a                             |
|             | Drought (D)                 | T2  | 26.7 ± 1.62 i     | 0.294 ± 0.01 i         | 3.16 ± 0.28 h                             |
|             | D + 1 mM SA                 | T3  | 28.6 ± 1.74 gh    | 0.344 ± 0.03 h         | 3.58 ± 0.45 fg                            |
|             | D + 1.5 mM SA               | T4  | 31.5 ± 2.13 f     | 0.381 ± 0.02 f         | 3.92 ± 0.41 de                            |
|             | D + 2 mM SA                 | T5  | 29.4 ± 1.88 g     | 0.358 ± 0.02 gh        | 3.75 ± 0.38 f                             |
|             | D + 1 mM Pro                | T6  | 28.2 ± 2.42 gh    | 0.338 ± 0.03 h         | 3.51 ± 0.31 fg                            |
|             | D + 2 mM Pro                | T7  | 30.6 ± 2.18 fg    | 0.369 ± 0.02 g         | 3.84 ± 0.45 e                             |
|             | D + 3 mM Pro                | T8  | 29.0 ± 1.85 g     | 0.351 ± 0.02 gh        | 3.68 ± 0.52 f                             |
|             | D + (1.5 mM SA + 2 mM Pro)  | T9  | 27.3 ± 2.66 g     | 0.331 ± 0.03 h         | 3.29 ± 0.42 g                             |
|             | D + (1 mM SA + 1 mM Pro)    | T10 | 30.9 ± 2.43 fg    | 0.373 ± 0.04 fg        | 3.98 ± 0.35 d                             |
|             | D + (0.75 mM SA + 1 mM Pro) | T11 | 33.8 ± 2.71 e     | 0.394 ± 0.03 e         | 4.15 ± 0.38                               |

Mean values followed by different letters in the same column are significantly different from each other (Tukey's test  $P < 0.05$ ). The data represent means of five replicates ± standard error ( $n = 5$ ).
